# Supplementary material
Source: MDPI journal article supplement (https://www.mdpi.com/2076-3417/12/4/1847)
Supplement: s1 [file s1]

Archive with 3 entries (3 files):
- Supplementary S1.xlsx
- Supplementary S2.xlsx
- Supplementary S3.pdf
