# Supplementary material
Source: MDPI journal article supplement (https://www.mdpi.com/2076-3417/12/4/1847)
Supplement: s1 [file s1 › Supplementary S2.xlsx]

## Sheet: Sheet1
No.	Question	S01	S02	S03	S04	S05	S06	S07	S08	S09	S10	S11	S12	S13	S14	S15	S16	S17	S18	S19	S20	S21	S22	S23	S24	S25	S26	S27	S28	S29	S30
1	I think that I would like to use this system frequently.	2	2	3	4	5	2	5	4	3	3	1	3	3	3	5	4	4	5	5	4	4	5	3	4	5	4	5	4	5	5
2	I found the system unnecessarily complex.	2	2	2	5	3	1	1	2	1	4	5	1	3	2	4	2	2	1	4	1	1	2	1	2	1	2	1	1	2	1
3	I thought the system was easy to use.	4	4	3	2	3	5	4	4	4	4	1	4	5	4	2	4	5	5	4	5	5	5	4	5	5	5	5	5	4	5
4	I think that I would need the support of a technical person to be able to use this system.	1	3	2	3	1	2	1	2	2	1	1	3	2	2	1	1	1	1	2	2	1	3	4	2	1	1	1	2	1	4
5	I found the various functions in this system were well integrated.	3	3	3	2	4	1	2	3	3	3	1	3	1	3	1	3	4	5	3	4	2	4	4	4	5	5	5	5	4	3
6	I thought there was too much inconsistency in this system.	1	2	2	3	1	4	1	2	1	2	5	2	3	2	2	1	1	1	1	1	2	2	1	1	1	1	1	2	1	1
7	I would imagine that most people would learn to use this system very quickly.	4	2	4	2	4	4	5	4	3	3	3	4	2	3	2	4	2	4	4	4	4	5	1	4	5	5	4	4	4	3
8	I found the system very cumbersome to use.	1	4	2	4	1	1	2	2	1	2	5	3	4	2	2	1	1	1	2	1	1	2	2	1	1	2	1	2	1	2
9	I felt very confident using the system.	4	3	3	3	5	4	5	4	4	4	5	4	5	3	5	4	5	5	4	4	5	5	3	4	5	5	5	5	5	5
10	I needed to learn a lot of things before I could get going with this system.	2	4	2	4	1	2	1	2	1	1	1	3	1	2	3	2	2	2	4	2	1	2	1	3	1	2	1	2	1	1
