# Supplementary material
Source: MDPI journal article supplement (https://www.mdpi.com/2076-3417/12/4/1847)
Supplement: s1 [file s1 › Supplementary S3.pdf]

**Table S1.** Semi-structured interview protocol of the study.

| Key theme                          | Category   | Question                                                                                                                                                               |
|------------------------------------|------------|------------------------------------------------------------------------------------------------------------------------------------------------------------------------|
| Intention of use                   | Blockchain | Do you feel the need for blockchain technology?<br>What are the security issues caused by blockchain technology?                                                       |
|                                    | PHR        | Do you feel the need for a patient-centric PHR platform?<br>Do you willing to use PHR services?                                                                        |
| Acceptance of technology           | Blockchain | Do you know how blockchain technology works?<br>What are the benefits of using blockchain technology?<br>What are the concerns with blockchain technology?             |
|                                    | PHR        | Is the information provided by the app clear?<br>Do you understand the information provided by the app?<br>Do you feel convenient for finding features within the app? |
| Health data management and sharing | Blockchain | If you could utilize data using blockchain technology, what would it be?<br>Do you think it is safe to use blockchain technology to make data available?               |
|                                    | PHR        | Are you interested in using your personal health information independently?<br>What are the important factors in sharing personal health information?                  |
