# Supplementary material
Source: MDPI journal article supplement (https://www.mdpi.com/2076-3417/12/4/1847)
Supplement: s1 [file Supplementary S1.xlsx]

## Sheet: Sheet2
Encounter data	Date
	Department
	State of consciousness
	Blood pressure
	Pulse
	Respiration rate
	Body temperature
	Oxygen saturation
Treament data	Department
	Details
Lab data	Name
	Date
	Result
Prescription data	Date
	Product name
	Dosage
	Number of times of administration
	Number of days of administration
Discharge data	Date
	Outcome
	Diagnosis
	Admission department
	Transfer hospital
	Details
Consent data	Patient categorization key
	Assentient categorization
	Assentient key
	Consent informed organization
	Consent informed key
	Consent key
	Consent date
	Consent data (Pros / Cons)
	Consent version
	Consent title
	Consent content
	Medical staff categorization key
	Details
